# Supplementary material for: Recruitment of histone modifications to assist mRNA dosage maintenance after degeneration of cytosine DNA methylation during animal evolution
Source: PubMed Central journal article supplement — Genome Res. 2017 Sep;27(9):1513–24. doi: 10.1101/gr.221739.117 (PMC5580711; doi:10.1101/gr.221739.117), 2017-09

**Supplemental Fig. S9.** Recalculated intensities of the various active or repressive histone marks indicated on common acting regions of mouse **(A)**, fly **(B)**, and worm **(C)** genes are shown, when ortholog sets with a  $\bar{d}_5 > 1$  were excluded from the analyses. Both active and repressive histone marks were compared according to *Predicted Patterns I-III*. For a detailed description of the figure see the legend of Fig. 2.

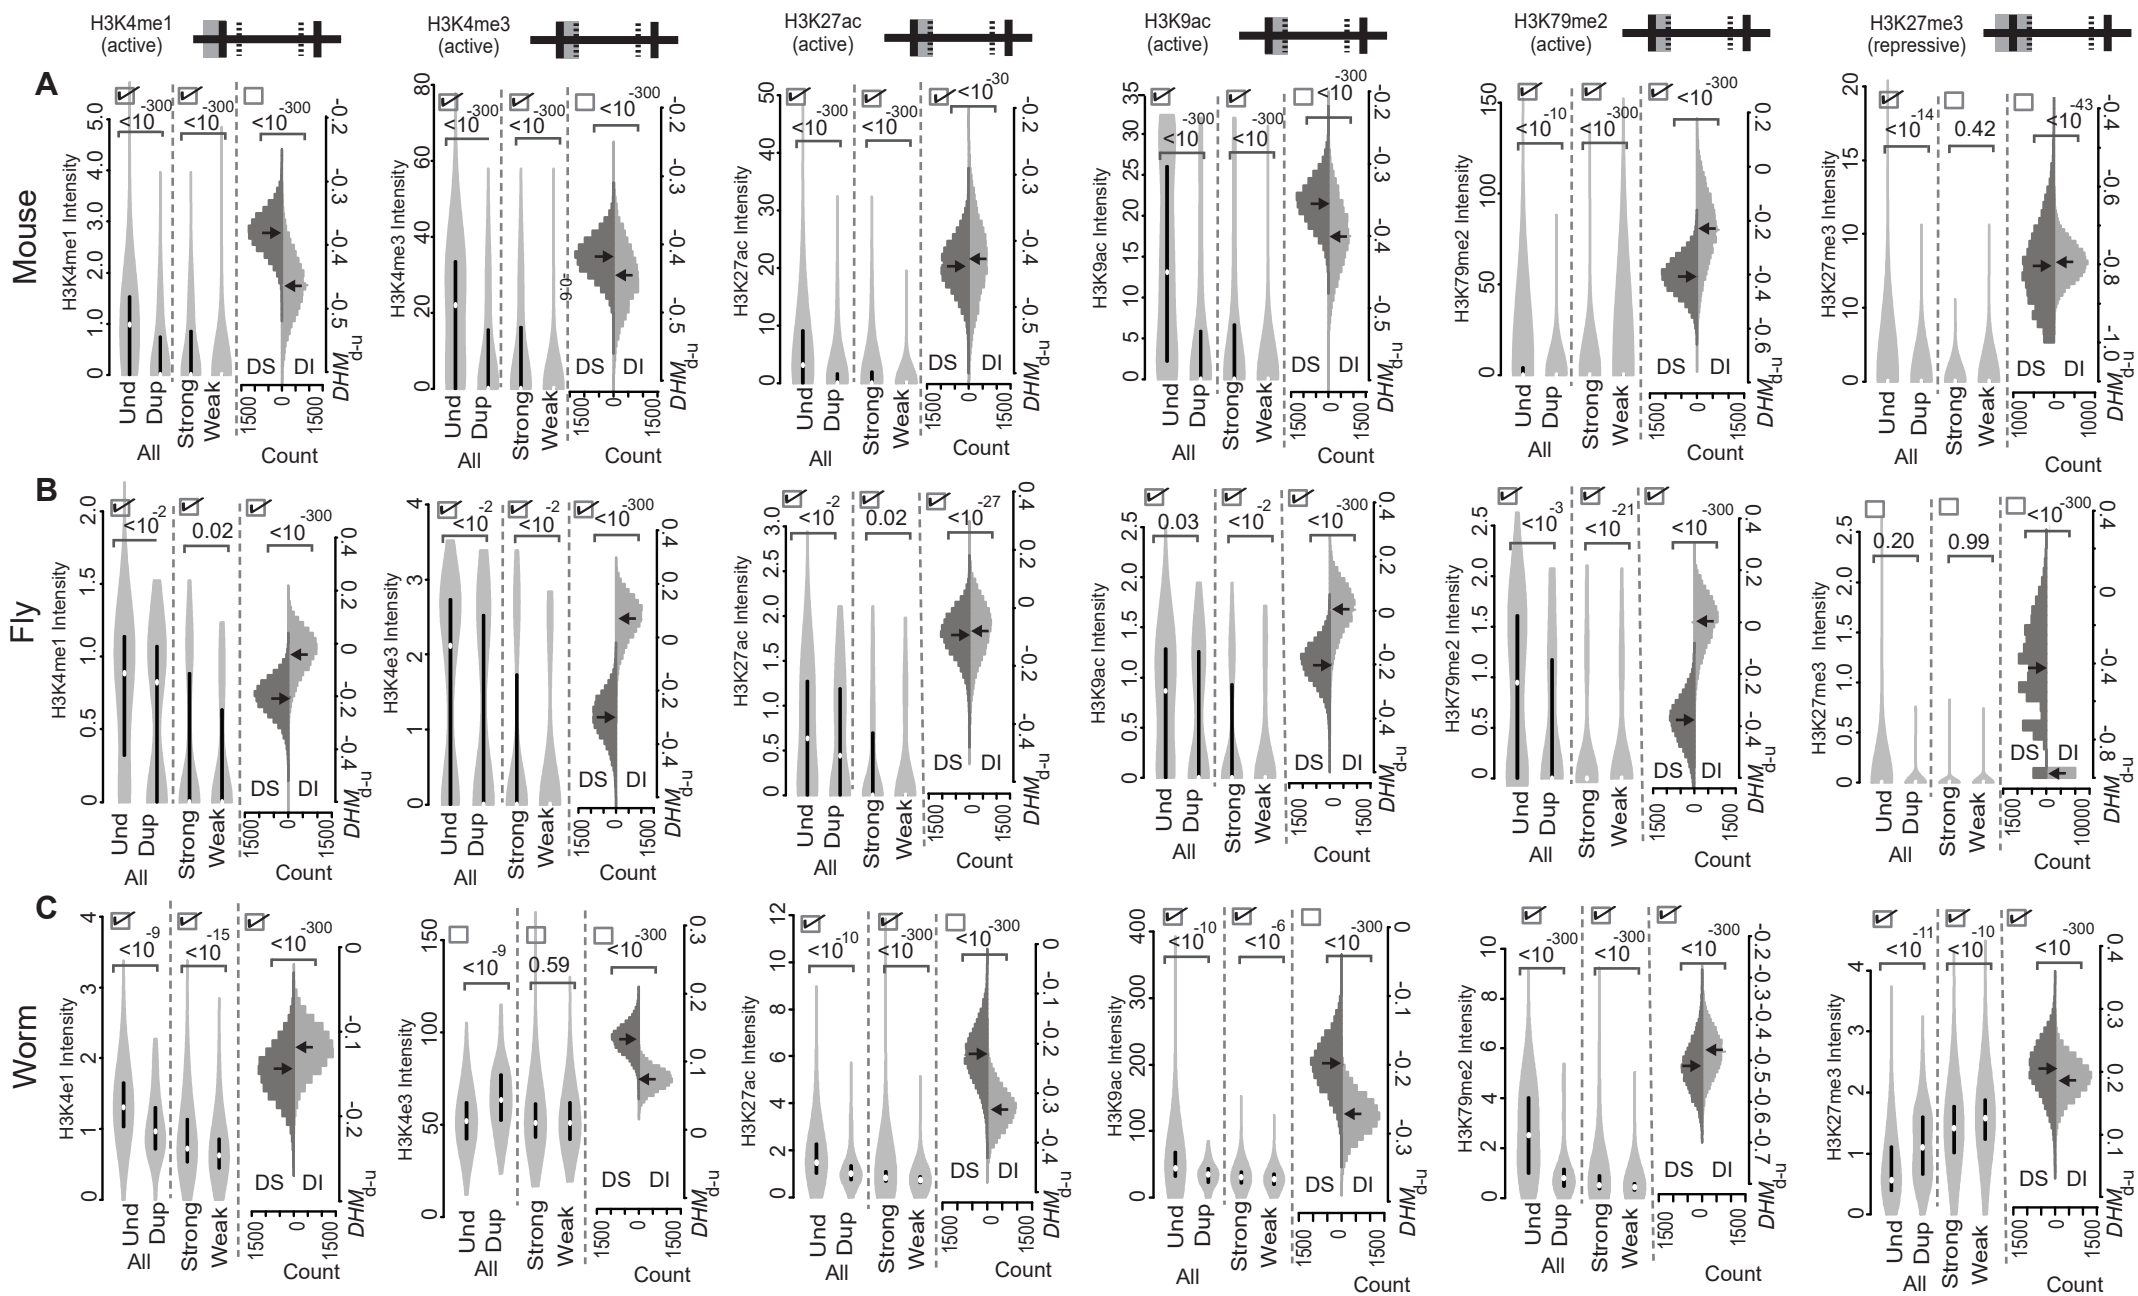

Supplement: supp_gr.221739.117_Supplemental_Fig_S9.pdf [file supp_gr.221739.117_Supplemental_Fig_S9.pdf]
