# Supplementary material for: Recruitment of histone modifications to assist mRNA dosage maintenance after degeneration of cytosine DNA methylation during animal evolution
Source: PubMed Central journal article supplement — Genome Res. 2017 Sep;27(9):1513–24. doi: 10.1101/gr.221739.117 (PMC5580711; doi:10.1101/gr.221739.117), 2017-09

**Supplemental Fig. S12.** Recalculated intensities of the various active or repressive histone marks indicated on invertebrate-specific (A) and worm-specific (B) acting regions of fly (A) and worm (A, B) genes, when ChIP-seq reads were mapped by TopHat with the parameters “-N 0 -g 0”. Both active and repressive histone marks were compared according to *Predicted Patterns I-III*. For a detailed description of the figure see the legend of Fig. 2.

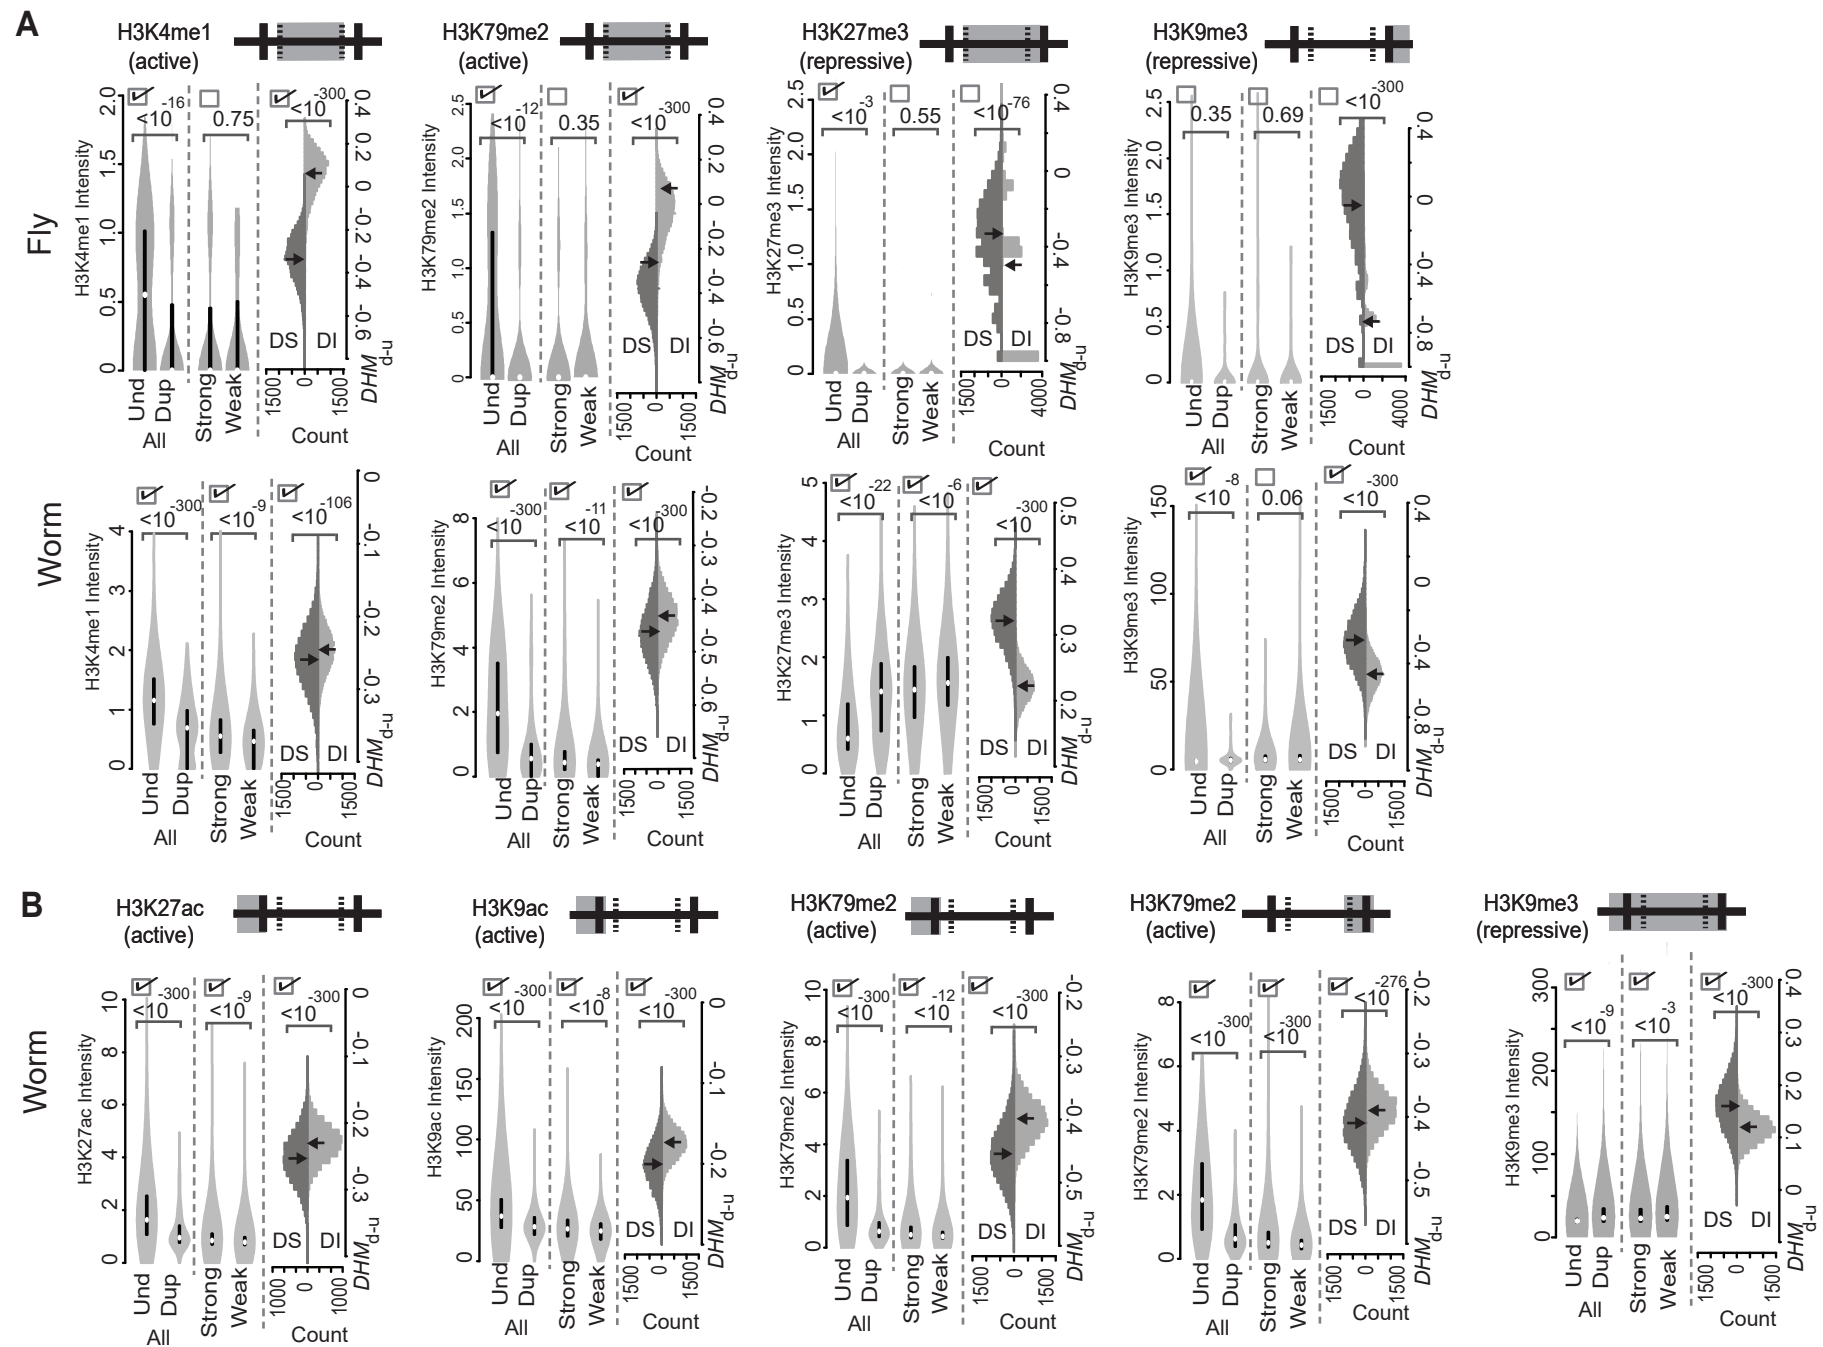

Supplement: supp_gr.221739.117_Supplemental_Fig_S12.pdf [file supp_gr.221739.117_Supplemental_Fig_S12.pdf]
