# Supplementary material for: Recruitment of histone modifications to assist mRNA dosage maintenance after degeneration of cytosine DNA methylation during animal evolution
Source: PubMed Central journal article supplement — Genome Res. 2017 Sep;27(9):1513–24. doi: 10.1101/gr.221739.117 (PMC5580711; doi:10.1101/gr.221739.117), 2017-09
Supplement: supp_gr.221739.117_Supplemental_Table_S1.pdf [file supp_gr.221739.117_Supplemental_Table_S1.pdf]

**Supplemental Table S1.** Comparison of Spearman's correlation coefficient ( $\rho$ ) between  $\Delta E_{A-B}$  and  $S_{A/B}$  between the complex and non-complex ortholog sets.

| Organism | All                           |      | Complex                       |     | Non-complex                   |      |
|----------|-------------------------------|------|-------------------------------|-----|-------------------------------|------|
|          | $\rho$ ( <i>P</i> -value)     | N    | $\rho$ ( <i>P</i> -value)     | N   | $\rho$ ( <i>P</i> -value)     | N    |
| Mammals  | -0.332 (< 10 <sup>-25</sup> ) | 854  | -0.685 (< 10 <sup>-26</sup> ) | 190 | -0.243 (< 10 <sup>-11</sup> ) | 664  |
| Flies    | -0.225 (< 10 <sup>-5</sup> )  | 355  | -0.415 (< 10 <sup>-3</sup> )  | 66  | -0.186 (< 10 <sup>-3</sup> )  | 289  |
| Worms    | -0.360 (< 10 <sup>-49</sup> ) | 1589 | -0.483 (< 10 <sup>-4</sup> )  | 73  | -0.352 (< 10 <sup>-44</sup> ) | 1516 |
