# Supplementary material for: Recruitment of histone modifications to assist mRNA dosage maintenance after degeneration of cytosine DNA methylation during animal evolution
Source: PubMed Central journal article supplement — Genome Res. 2017 Sep;27(9):1513–24. doi: 10.1101/gr.221739.117 (PMC5580711; doi:10.1101/gr.221739.117), 2017-09
Supplement: supp_gr.221739.117_Supplemental_Table_S3.pdf [file supp_gr.221739.117_Supplemental_Table_S3.pdf]

**Supplemental Table S3.** Mouse tissues used for histone modification studies and the corresponding data available from ChIP-seq and RNA-seq experiments

| Histone marks | Mouse tissue studied* | ChIP-seq data <sup>a</sup> | RNA-seq data <sup>b</sup> |
|---------------|-----------------------|----------------------------|---------------------------|
| H3K4me1       | Lung                  | ENCSR000CAQ                | GSM900196                 |
| H3K4me3       | Lung                  | ENCSR000CAR                | GSM900196                 |
| H3K27ac       | Heart                 | ENCSR000CDF                | GSM900199                 |
| H3K9ac        | Heart                 | ENCSR000CEM                | GSM900199                 |
| H3K79me2      | Heart                 | ENCSR000CEL                | GSM900199                 |
| H3K27me3      | Heart                 | ENCSR000CEJ                | GSM900199                 |

\*All of the tissues studied were from adult, 8-week-old male mice.

<sup>a</sup>Data available from the ENCODE database: <https://www.encodeproject.org/experiments/>

<sup>b</sup>Data available from the NCBI GEO DataSet GSE49847: <http://www.ncbi.nlm.nih.gov/geo>
