# Supplementary material for: Recruitment of histone modifications to assist mRNA dosage maintenance after degeneration of cytosine DNA methylation during animal evolution
Source: PubMed Central journal article supplement — Genome Res. 2017 Sep;27(9):1513–24. doi: 10.1101/gr.221739.117 (PMC5580711; doi:10.1101/gr.221739.117), 2017-09
Supplement: supp_gr.221739.117_Supplemental_Table_S6.pdf [file supp_gr.221739.117_Supplemental_Table_S6.pdf]

**Supplemental Table S6.** Comparison of Spearman's correlation coefficient ( $\rho$ ) between  $\Delta E_{A-B}$  and  $S_{A/B}$  for the dosage sensitive versus dosage insensitive ortholog sets or for the complex versus non-complex ortholog sets in flies. *D. melanogaster* - *D. pseudoobscura* ortholog sets were used. Expression levels were estimated in L3 larva from both species.

| Categories of ortholog sets                    | $\rho$ ( <i>P</i> -value)     | N   |
|------------------------------------------------|-------------------------------|-----|
| <b>Dosage sensitive vs. dosage insensitive</b> |                               |     |
| All <sup>a</sup>                               | -0.482 (< 10 <sup>-26</sup> ) | 441 |
| Dosage sensitive                               | -0.567 (< 10 <sup>-19</sup> ) | 226 |
| Dosage insensitive                             | -0.399 (< 10 <sup>-8</sup> )  | 215 |
| <b>Complex vs. non-complex</b>                 |                               |     |
| All                                            | -0.412 (< 10 <sup>-33</sup> ) | 799 |
| Complex                                        | -0.631 (< 10 <sup>-21</sup> ) | 127 |
| Non-complex                                    | -0.364 (< 10 <sup>-26</sup> ) | 672 |

<sup>a</sup> Only ortholog sets defined as "dosage sensitive" or "dosage insensitive" were included.
