# Supplementary material for: Recruitment of histone modifications to assist mRNA dosage maintenance after degeneration of cytosine DNA methylation during animal evolution
Source: PubMed Central journal article supplement — Genome Res. 2017 Sep;27(9):1513–24. doi: 10.1101/gr.221739.117 (PMC5580711; doi:10.1101/gr.221739.117), 2017-09
Supplement: supp_gr.221739.117_Supplemental_Table_S7.pdf [file supp_gr.221739.117_Supplemental_Table_S7.pdf]

**Supplemental Table S7.** Comparison of Spearman's correlation coefficient ( $\rho$ ) between  $\Delta E_{A-B}$  and  $S_{A/B}$  for the dosage sensitive and dosage insensitive ortholog sets. Only ortholog sets with  $\bar{d}_s \leq 1$  were included in the analysis.

| Organisms | All <sup>a</sup>              |     | Dosage sensitive              |     | Dosage insensitive           |     |
|-----------|-------------------------------|-----|-------------------------------|-----|------------------------------|-----|
|           | $\rho$ ( <i>P</i> -value)     | N   | $\rho$ ( <i>P</i> -value)     | N   | $\rho$ ( <i>P</i> -value)    | N   |
| Mammals   | -0.475 (< 10 <sup>-21</sup> ) | 364 | -0.524 (< 10 <sup>-17</sup> ) | 234 | -0.400 (< 10 <sup>-5</sup> ) | 130 |
| Flies     | -0.345 (< 10 <sup>-7</sup> )  | 228 | -0.382 (< 10 <sup>-5</sup> )  | 128 | -0.288 (< 10 <sup>-2</sup> ) | 100 |
| Worms     | -0.427 (< 10 <sup>-7</sup> )  | 161 | -0.700 (< 10 <sup>-6</sup> )  | 44  | -0.332 (< 10 <sup>-3</sup> ) | 117 |

<sup>a</sup> Only ortholog sets that could be defined as "dosage sensitive" or "dosage insensitive" were analyzed.
