# Supplementary material for: Recruitment of histone modifications to assist mRNA dosage maintenance after degeneration of cytosine DNA methylation during animal evolution
Source: PubMed Central journal article supplement — Genome Res. 2017 Sep;27(9):1513–24. doi: 10.1101/gr.221739.117 (PMC5580711; doi:10.1101/gr.221739.117), 2017-09
Supplement: supp_gr.221739.117_Supplemental_Table_S8.pdf [file supp_gr.221739.117_Supplemental_Table_S8.pdf]

**Supplemental Table S8.** Comparison of Spearman's correlation coefficient ( $\rho$ ) between  $\Delta E_{A-B}$  and  $S_{A/B}$  between complex and non-complex ortholog sets. Only ortholog sets with  $\bar{d}_s \leq 1$  were included in the analysis. .

| Organisms | All                           |      | Complex                       |     | Non-complex                   |      |
|-----------|-------------------------------|------|-------------------------------|-----|-------------------------------|------|
|           | $\rho$ ( <i>P</i> -value)     | N    | $\rho$ ( <i>P</i> -value)     | N   | $\rho$ ( <i>P</i> -value)     | N    |
| Mammals   | -0.324 (< 10 <sup>-20</sup> ) | 803  | -0.537 (< 10 <sup>-13</sup> ) | 167 | -0.267 (< 10 <sup>-11</sup> ) | 636  |
| Flies     | -0.319 (< 10 <sup>-10</sup> ) | 327  | -0.560 (< 10 <sup>-5</sup> )  | 63  | -0.268 (< 10 <sup>-6</sup> )  | 264  |
| Worms     | -0.350 (< 10 <sup>-32</sup> ) | 1089 | -0.481 (< 10 <sup>-3</sup> )  | 55  | -0.341 (< 10 <sup>-28</sup> ) | 1034 |
