# Supplementary material for: Recruitment of histone modifications to assist mRNA dosage maintenance after degeneration of cytosine DNA methylation during animal evolution
Source: HighWire-hosted journal article supplement (doi:10.1101/gr.221739.117), 2017-07-18

**Supplemental Fig. S4.** Dosage sensitive (DS) ortholog sets tend to have a greater number of active marks and fewer repressive marks associated with mRNA dosage maintenance compared with the dosage insensitive (DI) ortholog sets in **(A)** mouse, **(B)** fly, and **(C)** worm. The examined marks are identified as active or repressive, along with their corresponding acting regions, above each boxplot. The upper quartile, median, and lower quartile values are indicated in each box of the boxplots, and the bars outside the box indicate semi-quartile ranges. *P*-values were determined with the Mann-Whitney *U*-test and are associated with the arched gray lines that indicate the values that were compared. Only histone modifications found to be related to mRNA dosage maintenance were investigated and are presented.

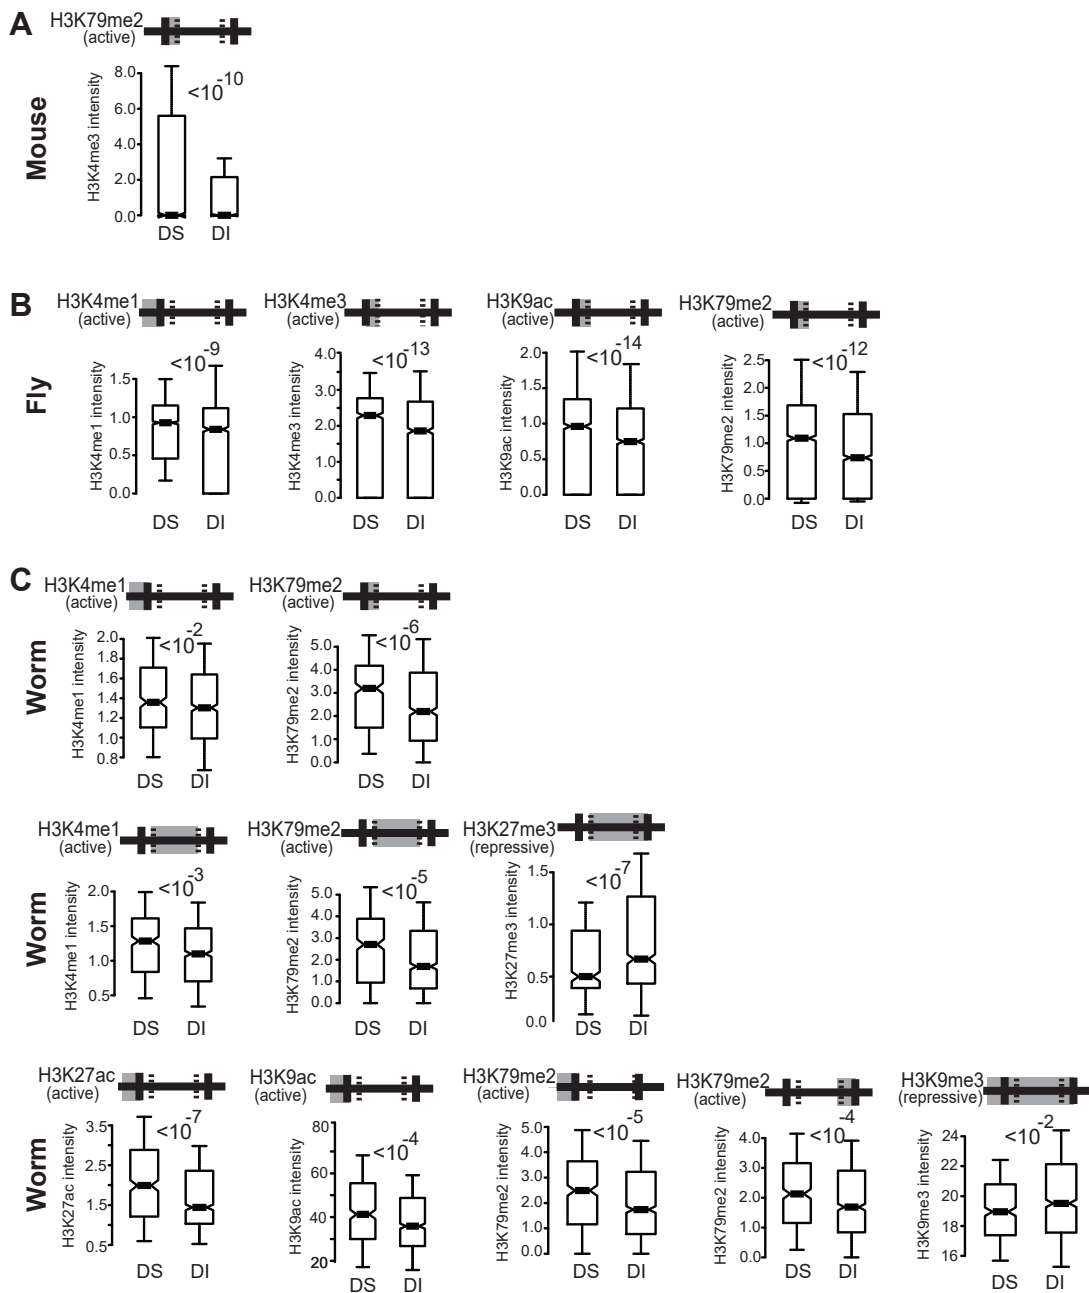

Supplement: Supplemental_Fig_S4.pdf [file Supplemental_Fig_S4.pdf]
