# Supplementary material for: Recruitment of histone modifications to assist mRNA dosage maintenance after degeneration of cytosine DNA methylation during animal evolution
Source: HighWire-hosted journal article supplement (doi:10.1101/gr.221739.117), 2017-07-18

**Supplemental Fig. S8.** In comparison with **(A)** mammalian and **(B)** fly ortholog sets, **(C)** worm ortholog sets were composed of duplicate genes that arose from older duplication events. The ages of the duplication events are approximated by  $\bar{d}_s$  between the paralogs.

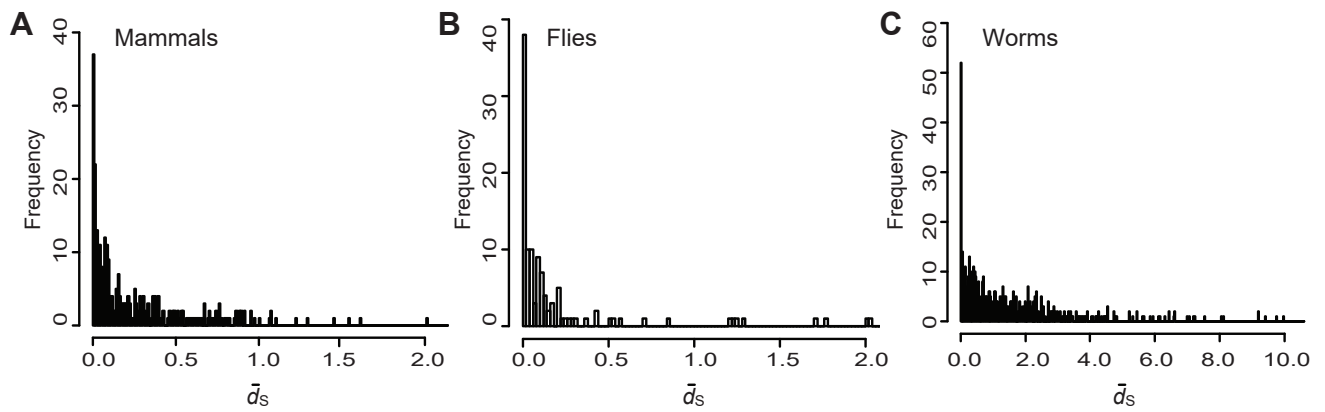

Supplement: Supplemental_Fig_S8.pdf [file Supplemental_Fig_S8.pdf]
