# Supplementary material for: Recruitment of histone modifications to assist mRNA dosage maintenance after degeneration of cytosine DNA methylation during animal evolution
Source: HighWire-hosted journal article supplement (doi:10.1101/gr.221739.117), 2017-07-18
Supplement: Supplemental_Table_S4.pdf [file Supplemental_Table_S4.pdf]

**Supplemental Table S4.** Comparison of Spearman's correlation coefficient ( $\rho$ ) between  $\Delta E_{A-B}$  and  $S_{A/B}$  for the dosage sensitive and dosage insensitive ortholog sets in various tissues/conditions of mammals, flies or worms. The numbers of ortholog sets used in the analysis are listed in Table 1.

| Tissues/stages         | $\rho$ ( $P$ -value)    |                         |                         |
|------------------------|-------------------------|-------------------------|-------------------------|
|                        | All <sup>a</sup>        | Dosage sensitive        | Dosage sensitive        |
| <b>Mammals</b>         |                         |                         |                         |
| Cerebelum <sup>b</sup> | -0.588 ( $< 10^{-40}$ ) | -0.635 ( $< 10^{-31}$ ) | -0.501 ( $< 10^{-10}$ ) |
| Breast                 | -0.465 ( $< 10^{-23}$ ) | -0.482 ( $< 10^{-16}$ ) | -0.428 ( $< 10^{-7}$ )  |
| Colon                  | -0.479 ( $< 10^{-25}$ ) | -0.495 ( $< 10^{-17}$ ) | -0.438 ( $< 10^{-8}$ )  |
| Heart                  | -0.522 ( $< 10^{-29}$ ) | -0.555 ( $< 10^{-22}$ ) | -0.459 ( $< 10^{-8}$ )  |
| Kidney                 | -0.513 ( $< 10^{-29}$ ) | -0.544 ( $< 10^{-21}$ ) | -0.461 ( $< 10^{-9}$ )  |
| Liver                  | -0.492 ( $< 10^{-26}$ ) | -0.509 ( $< 10^{-18}$ ) | -0.455 ( $< 10^{-8}$ )  |
| Lung                   | -0.515 ( $< 10^{-29}$ ) | -0.541 ( $< 10^{-21}$ ) | -0.466 ( $< 10^{-9}$ )  |
| Ovary                  | -0.507 ( $< 10^{-28}$ ) | -0.524 ( $< 10^{-19}$ ) | -0.481 ( $< 10^{-9}$ )  |
| <b>Flies</b>           |                         |                         |                         |
| L3 larva <sup>b</sup>  | -0.260 ( $< 10^{-4}$ )  | -0.339 ( $< 10^{-4}$ )  | -0.138 (0.161)          |
| Ovary                  | -0.332 ( $< 10^{-7}$ )  | -0.357 ( $< 10^{-4}$ )  | -0.314 ( $< 10^{-4}$ )  |
| <b>Worms</b>           |                         |                         |                         |
| L3 larva <sup>b</sup>  | -0.419 ( $< 10^{-11}$ ) | -0.580 ( $< 10^{-5}$ )  | -0.366 ( $< 10^{-6}$ )  |
| Mixed stages           | -0.218 ( $< 10^{-3}$ )  | -0.285 (0.032)          | -0.188 ( $< 10^{-2}$ )  |

<sup>a</sup> Only ortholog sets defined as “dosage sensitive” or “dosage insensitive” were included.

<sup>b</sup> The tissue/condition used to produce Table 1
