# Supplementary material for: Recruitment of histone modifications to assist mRNA dosage maintenance after degeneration of cytosine DNA methylation during animal evolution
Source: HighWire-hosted journal article supplement (doi:10.1101/gr.221739.117), 2017-07-18
Supplement: Supplemental_Table_S11.pdf [file Supplemental_Table_S11.pdf]

**Supplemental Table S11.** Comparison of Spearman's correlation coefficient ( $\rho$ ) between  $\Delta E_{A-B}$  and  $S_{A/B}$  for the dosage sensitive and dosage insensitive ortholog sets. To determine mRNA expression levels, RNA-seq reads were mapped to reference transcript annotations with a “-g 0” option.

| Organism | All <sup>a</sup>              |     | Dosage sensitive              |     | Dosage insensitive            |     |
|----------|-------------------------------|-----|-------------------------------|-----|-------------------------------|-----|
|          | $\rho$ ( <i>P</i> -value)     | N   | $\rho$ ( <i>P</i> -value)     | N   | $\rho$ ( <i>P</i> -value)     | N   |
| Mammals  | -0.569 (< 10 <sup>-37</sup> ) | 429 | -0.622 (< 10 <sup>-30</sup> ) | 270 | -0.516 (< 10 <sup>-11</sup> ) | 159 |
| Flies    | -0.266 (< 10 <sup>-4</sup> )  | 235 | -0.338 (< 10 <sup>-4</sup> )  | 130 | -0.144 (< 10 <sup>-2</sup> )  | 105 |
| Worms    | -0.425 (< 10 <sup>-12</sup> ) | 246 | -0.599 (< 10 <sup>-4</sup> )  | 57  | -0.346 (< 10 <sup>-5</sup> )  | 189 |

<sup>a</sup> Only ortholog sets defined as “dosage sensitive” or “dosage insensitive” were included.
